# Supplementary material
Source: publisher figshare collection journal article supplement (https://future-science-group.figshare.com/ndownloader/files/31362340)
Supplement: Supplementary file 1 [file 31362340]

**Supplementary table 1.** Factors affecting EFS by Cox's proportional hazards regression analysis.

| Items | *P* value | HR | 95%CI | |
| --- | --- | --- | --- | --- |
| Lower | Upper |
| **Multivariate Cox's regression analysis** |  |  |  |  |
| Higher ITGA7 quantile | 0.024 | 1.394 | 1.045 | 1.859 |
| Age (≥35 years vs. <35 years) | 0.002 | 2.995 | 1.478 | 6.069 |
| WBC**#** (increased vs. non-increased) | <0.001 | 4.010 | 2.032 | 7.913 |
| Hemoglobin (≥100 g/L vs. <100 g/L) | 0.041 | 0.330 | 0.114 | 0.953 |

**#** Increased WBC was defined as B-ALL patients >30×109/L at diagnosis, and T-ALL patients >100×109/L at diagnosis. EFS, event free survival; HR, hazard ratio; CI, confidence interval; ITGA7, integrin alpha7; WBC, white blood cell.
